# Supplementary material
Source: PubMed Central journal article supplement (PMC10541433)

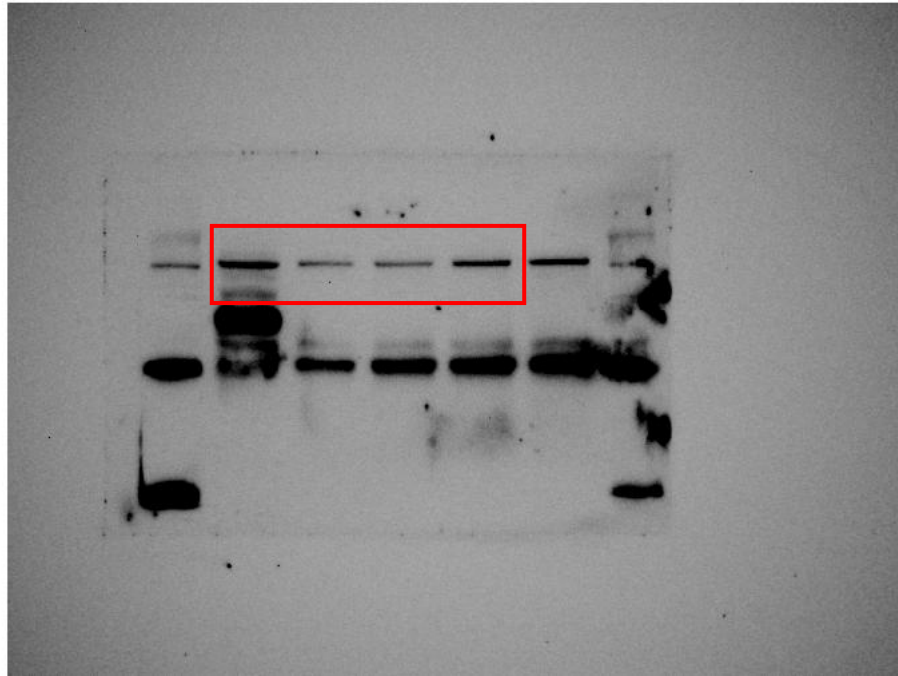

Unprocessed blot related to Figure 5B

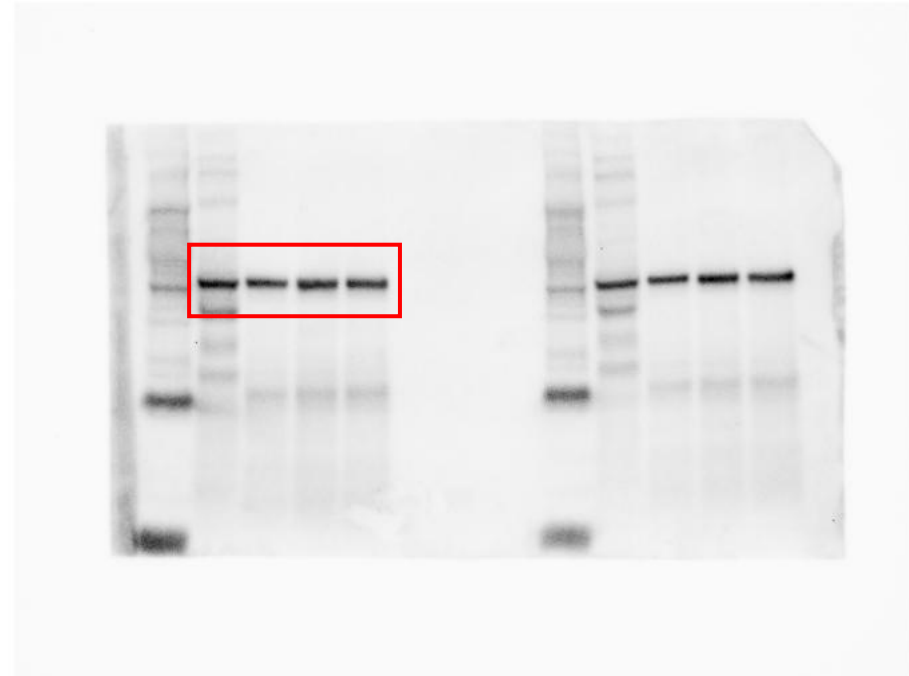

Unprocessed blot related to Figure 5C

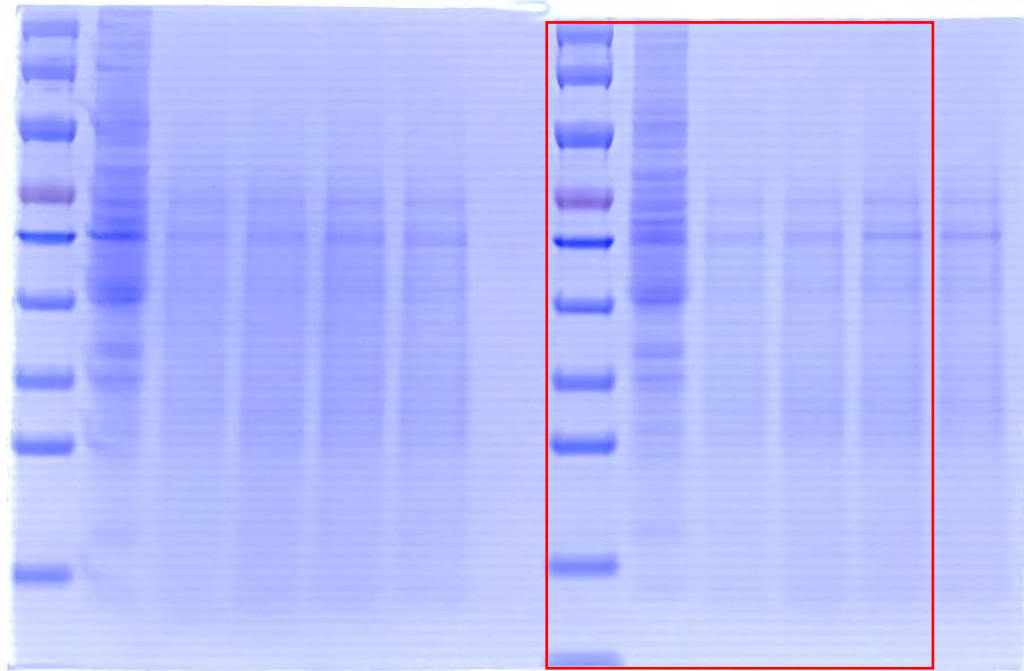

Unprocessed gel related to Figure S8A

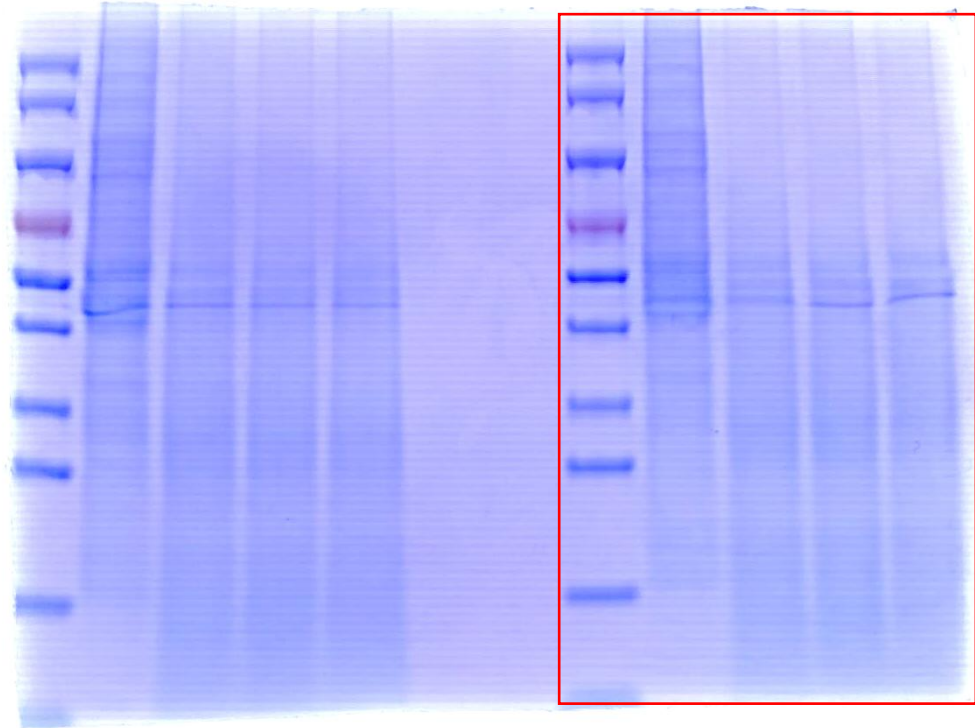

Unprocessed gel related to Figure S8B

DMSO

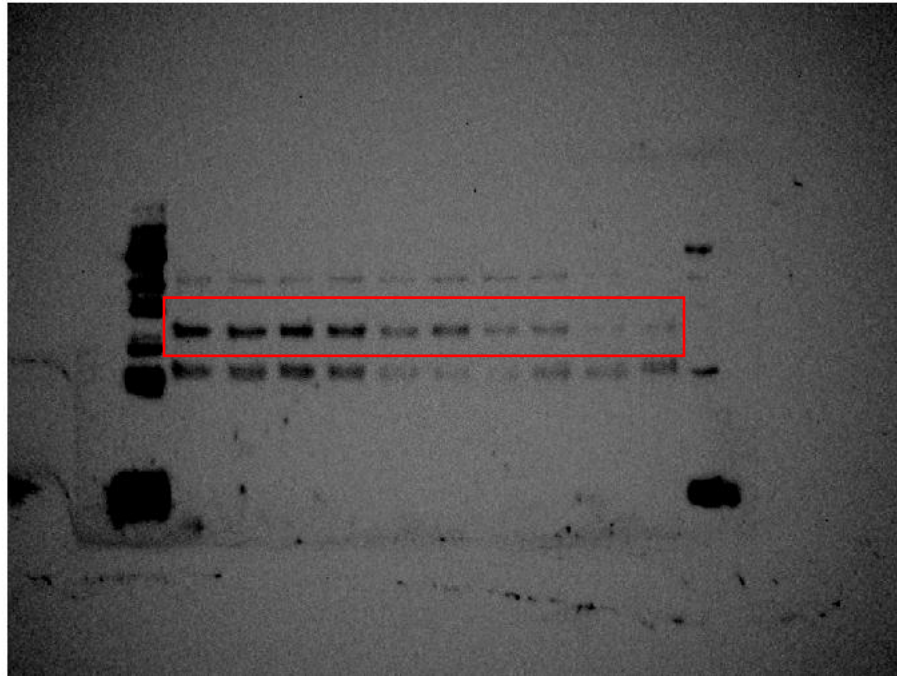

PPA

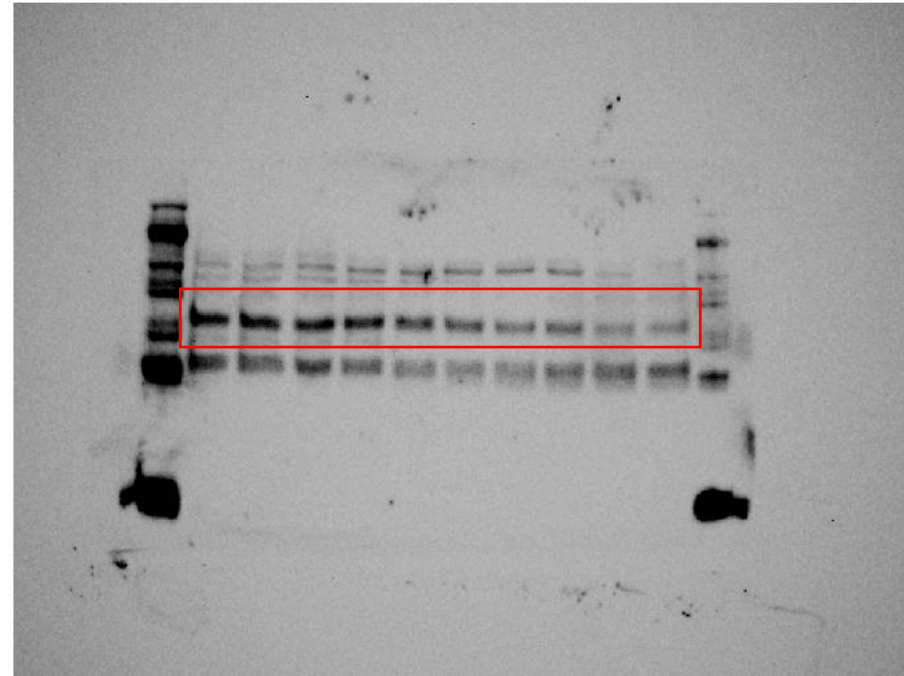

Unprocessed blot related to Figure S8C

DMSO

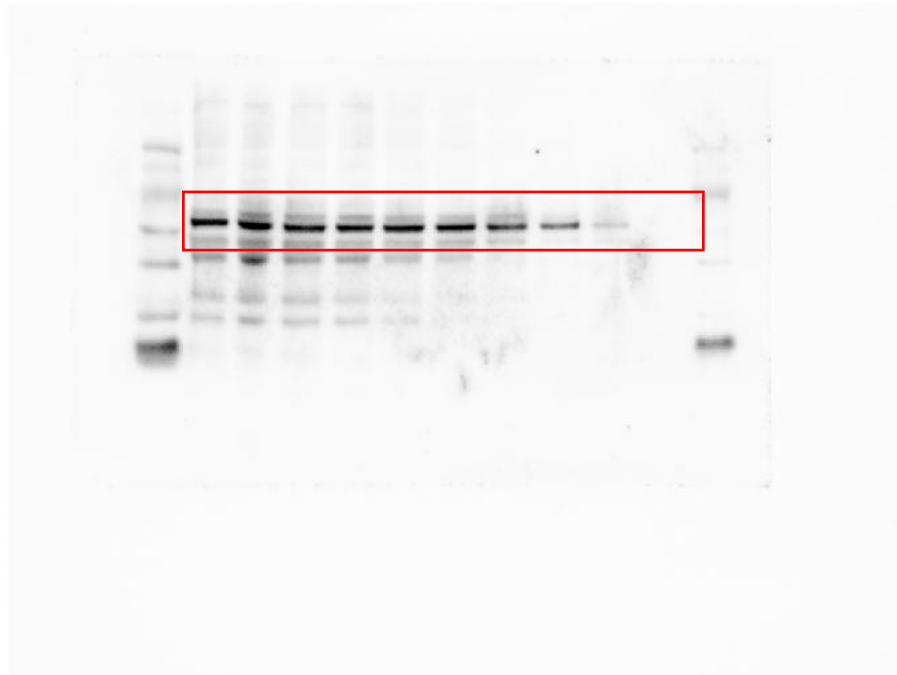

PPA

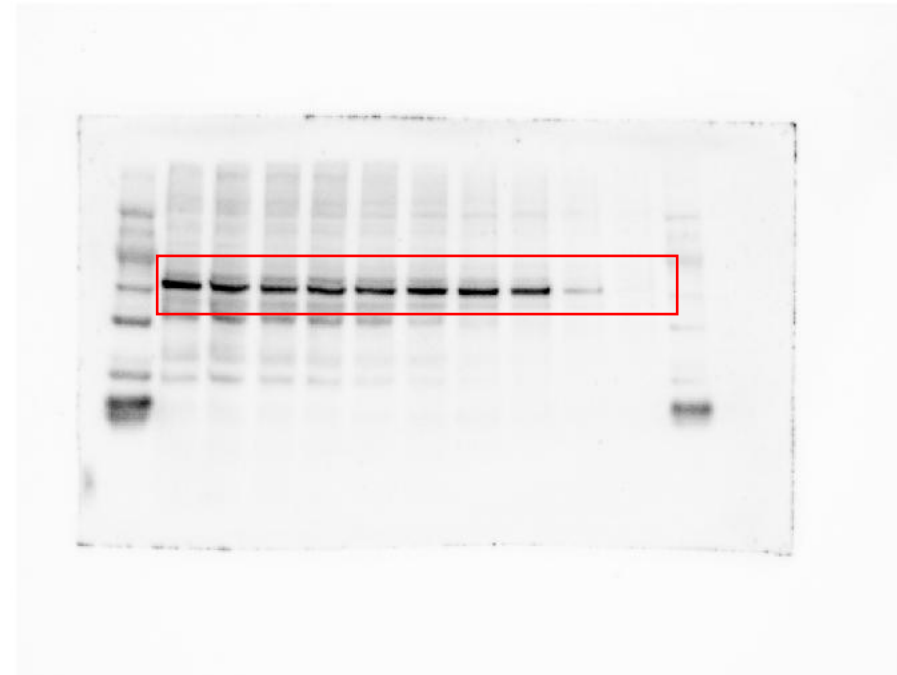

Unprocessed blot related to Figure S8D

AC-tubulin

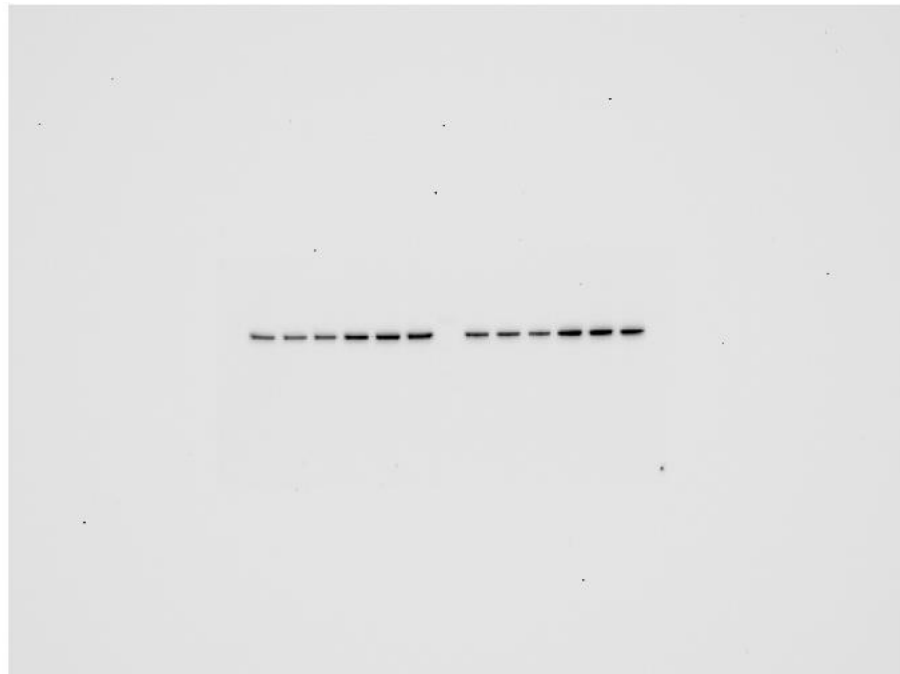

Unprocessed blot related to Figure S8E

tubulin

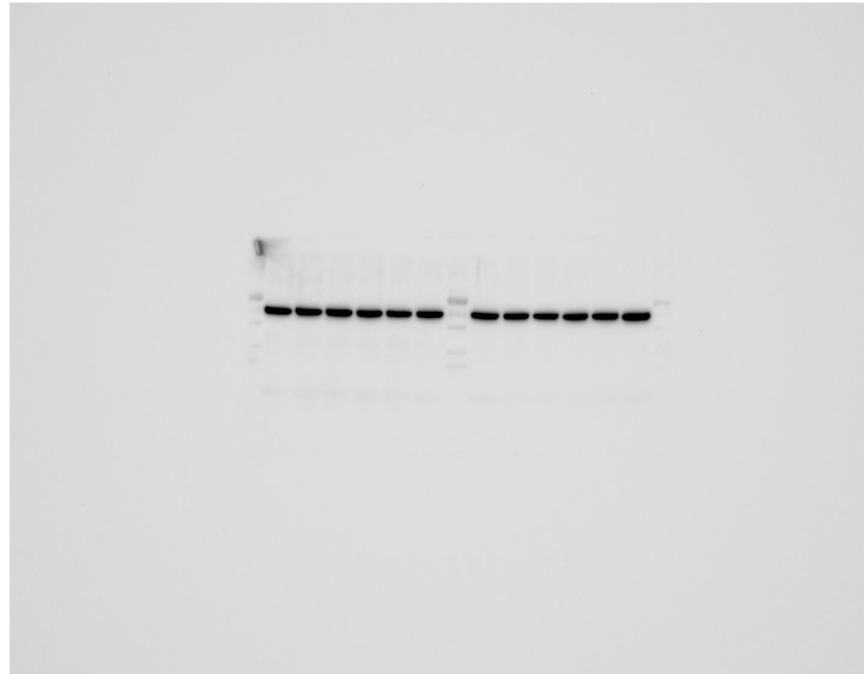

Supplement: 41423_2023_1070_MOESM3_ESM.pdf [file 41423_2023_1070_MOESM3_ESM.pdf]
