# Supplementary material
Source: PubMed Central journal article supplement (PMC10541433)

**Figure S1**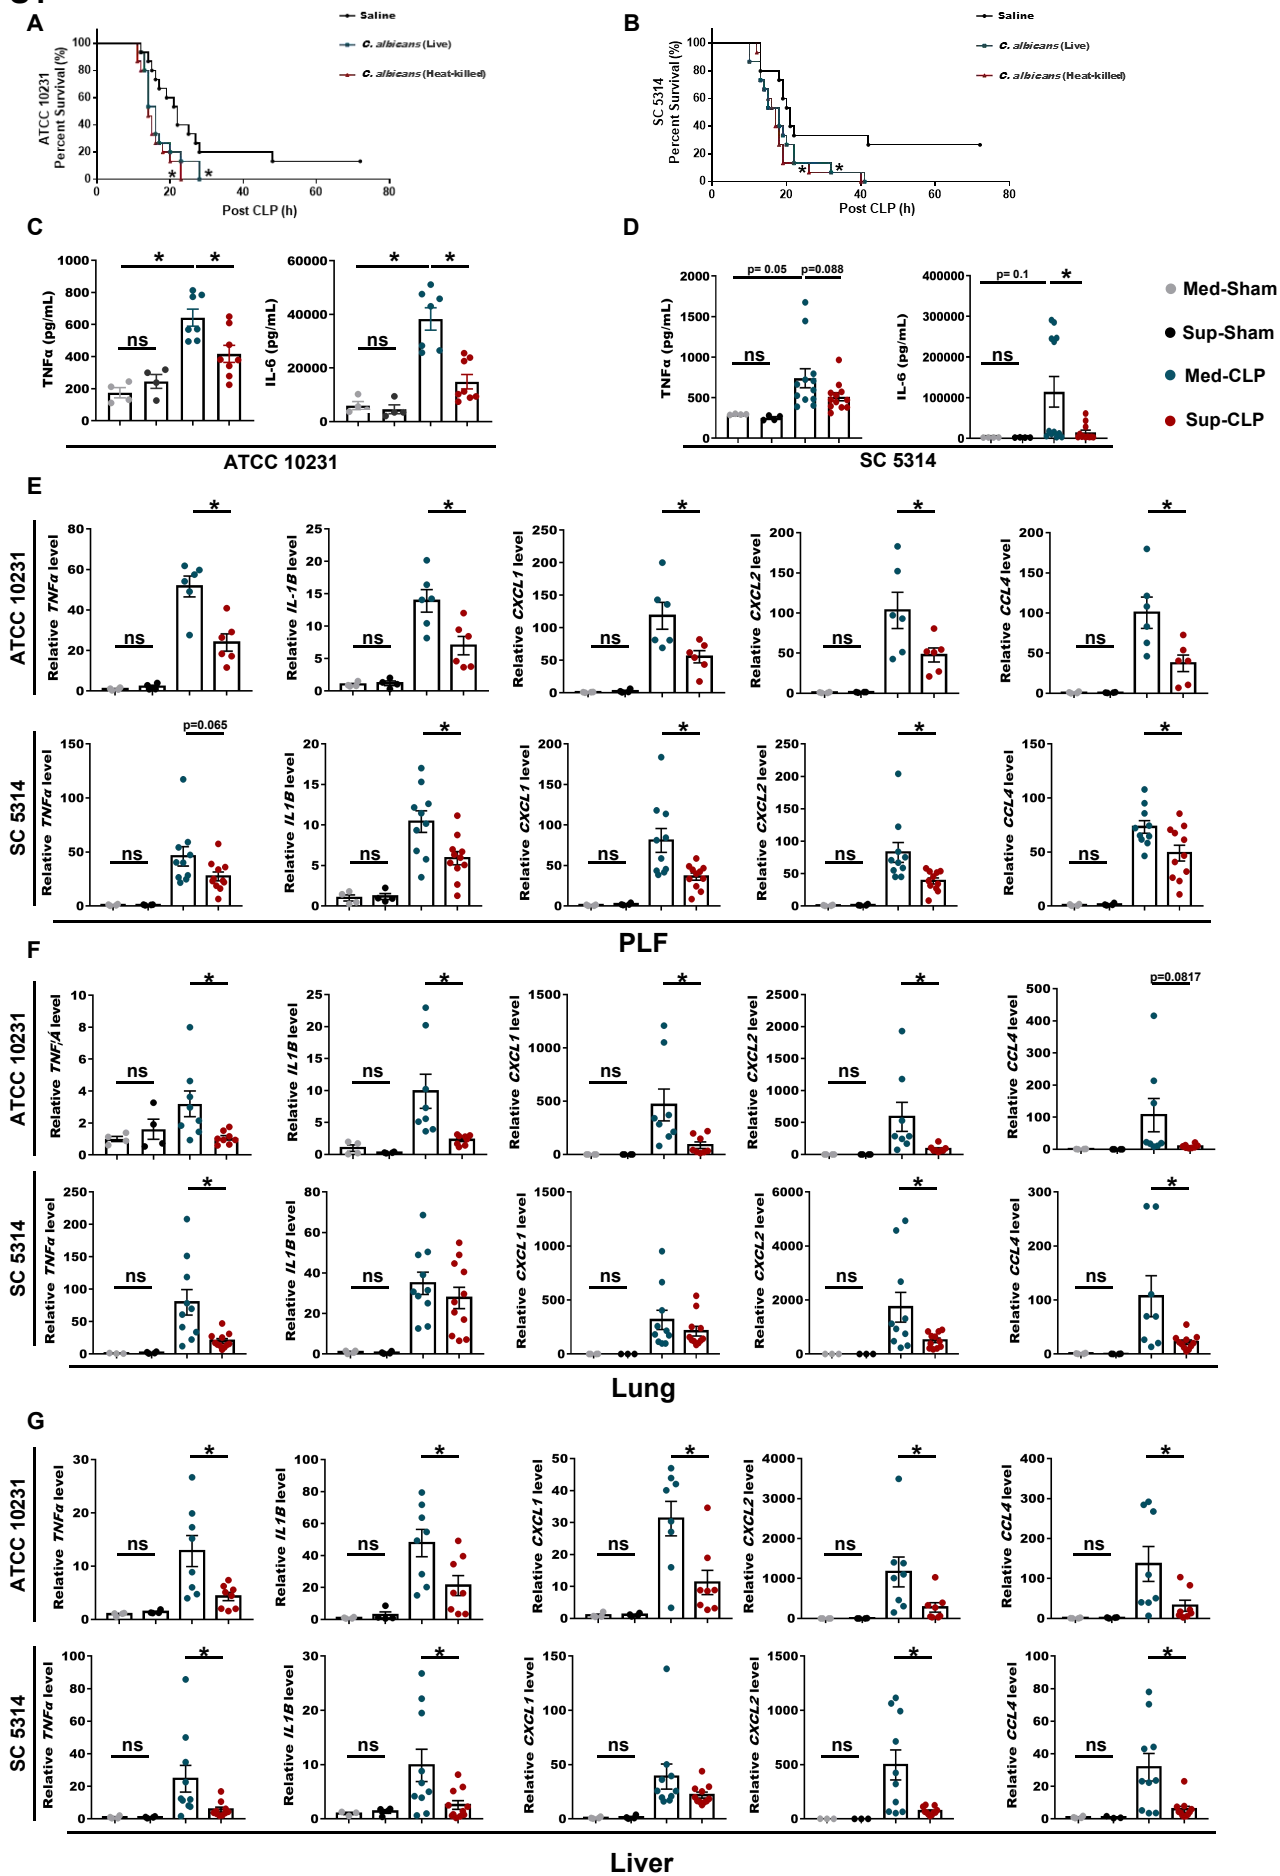

Figure S2

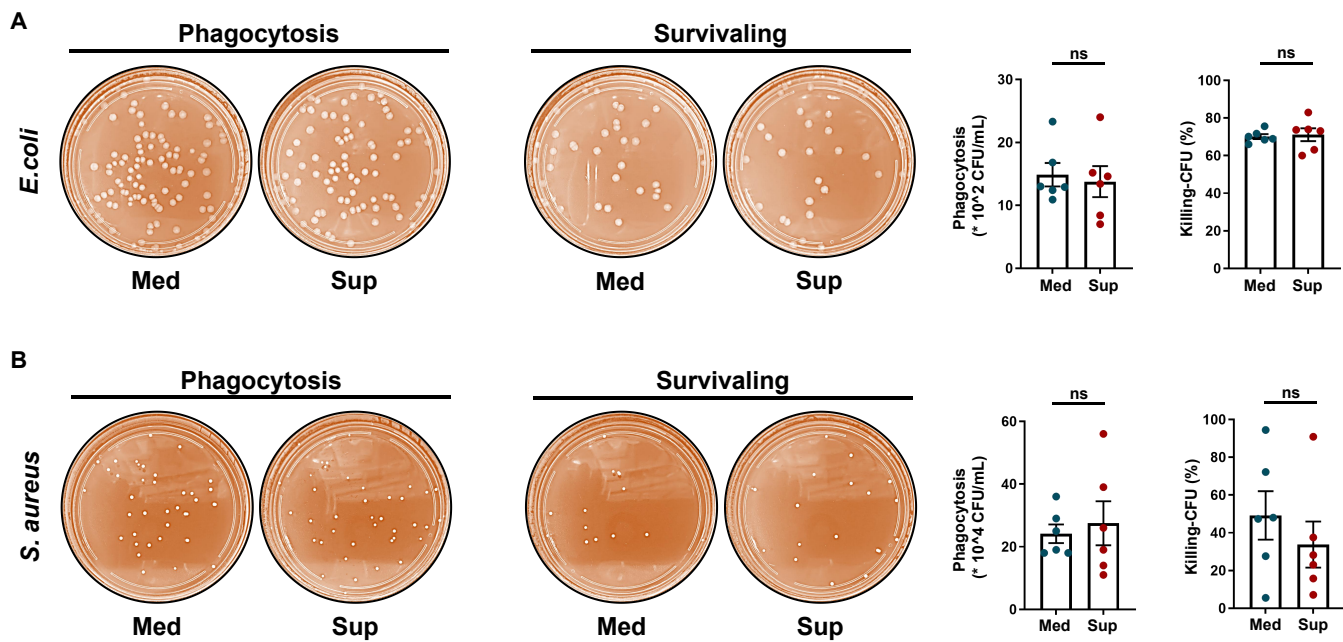

Figure S3

A

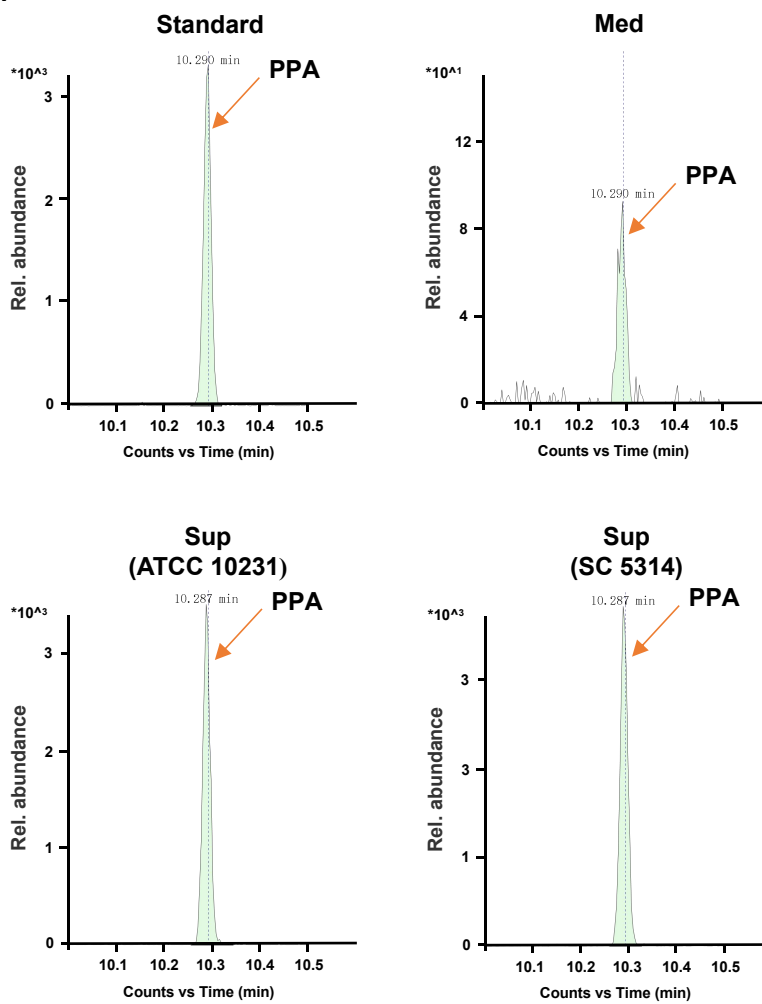

Figure S4

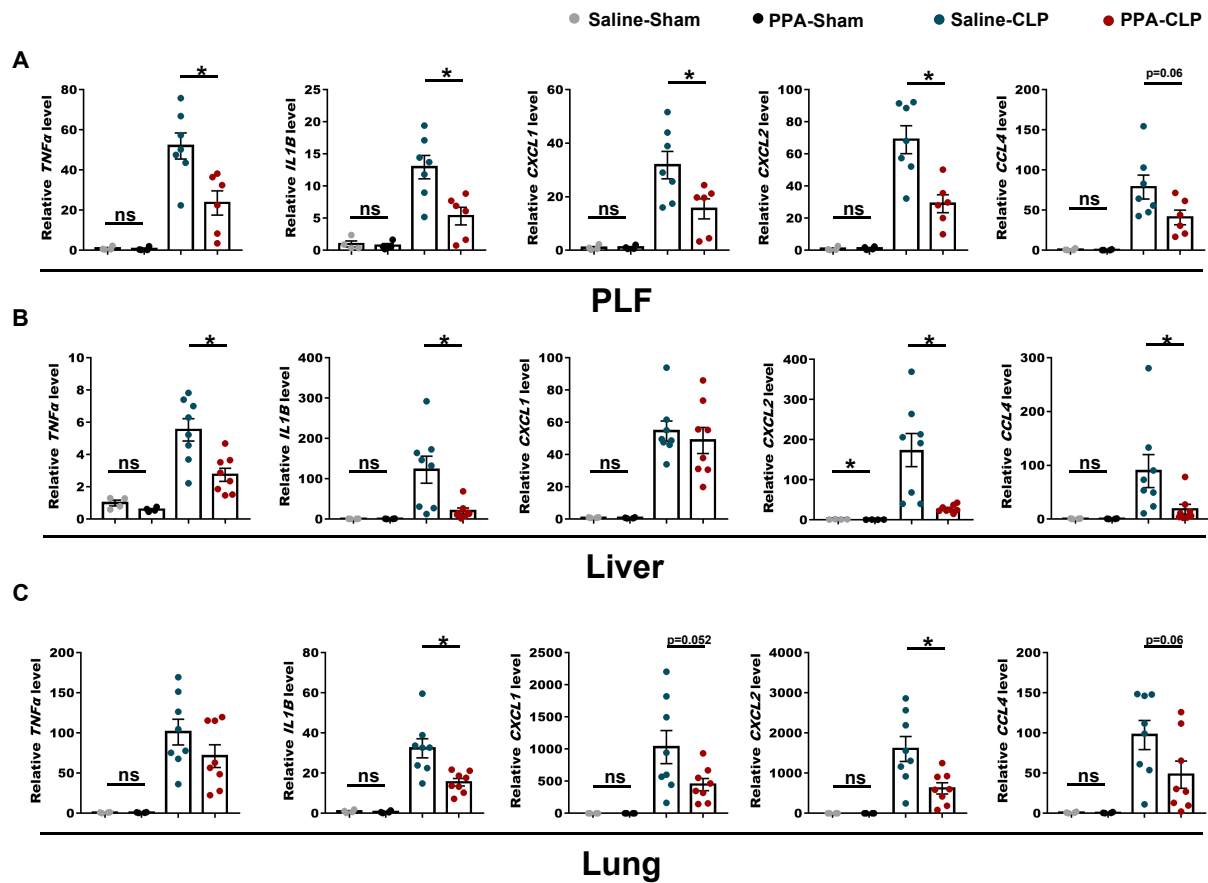

**Figure S5**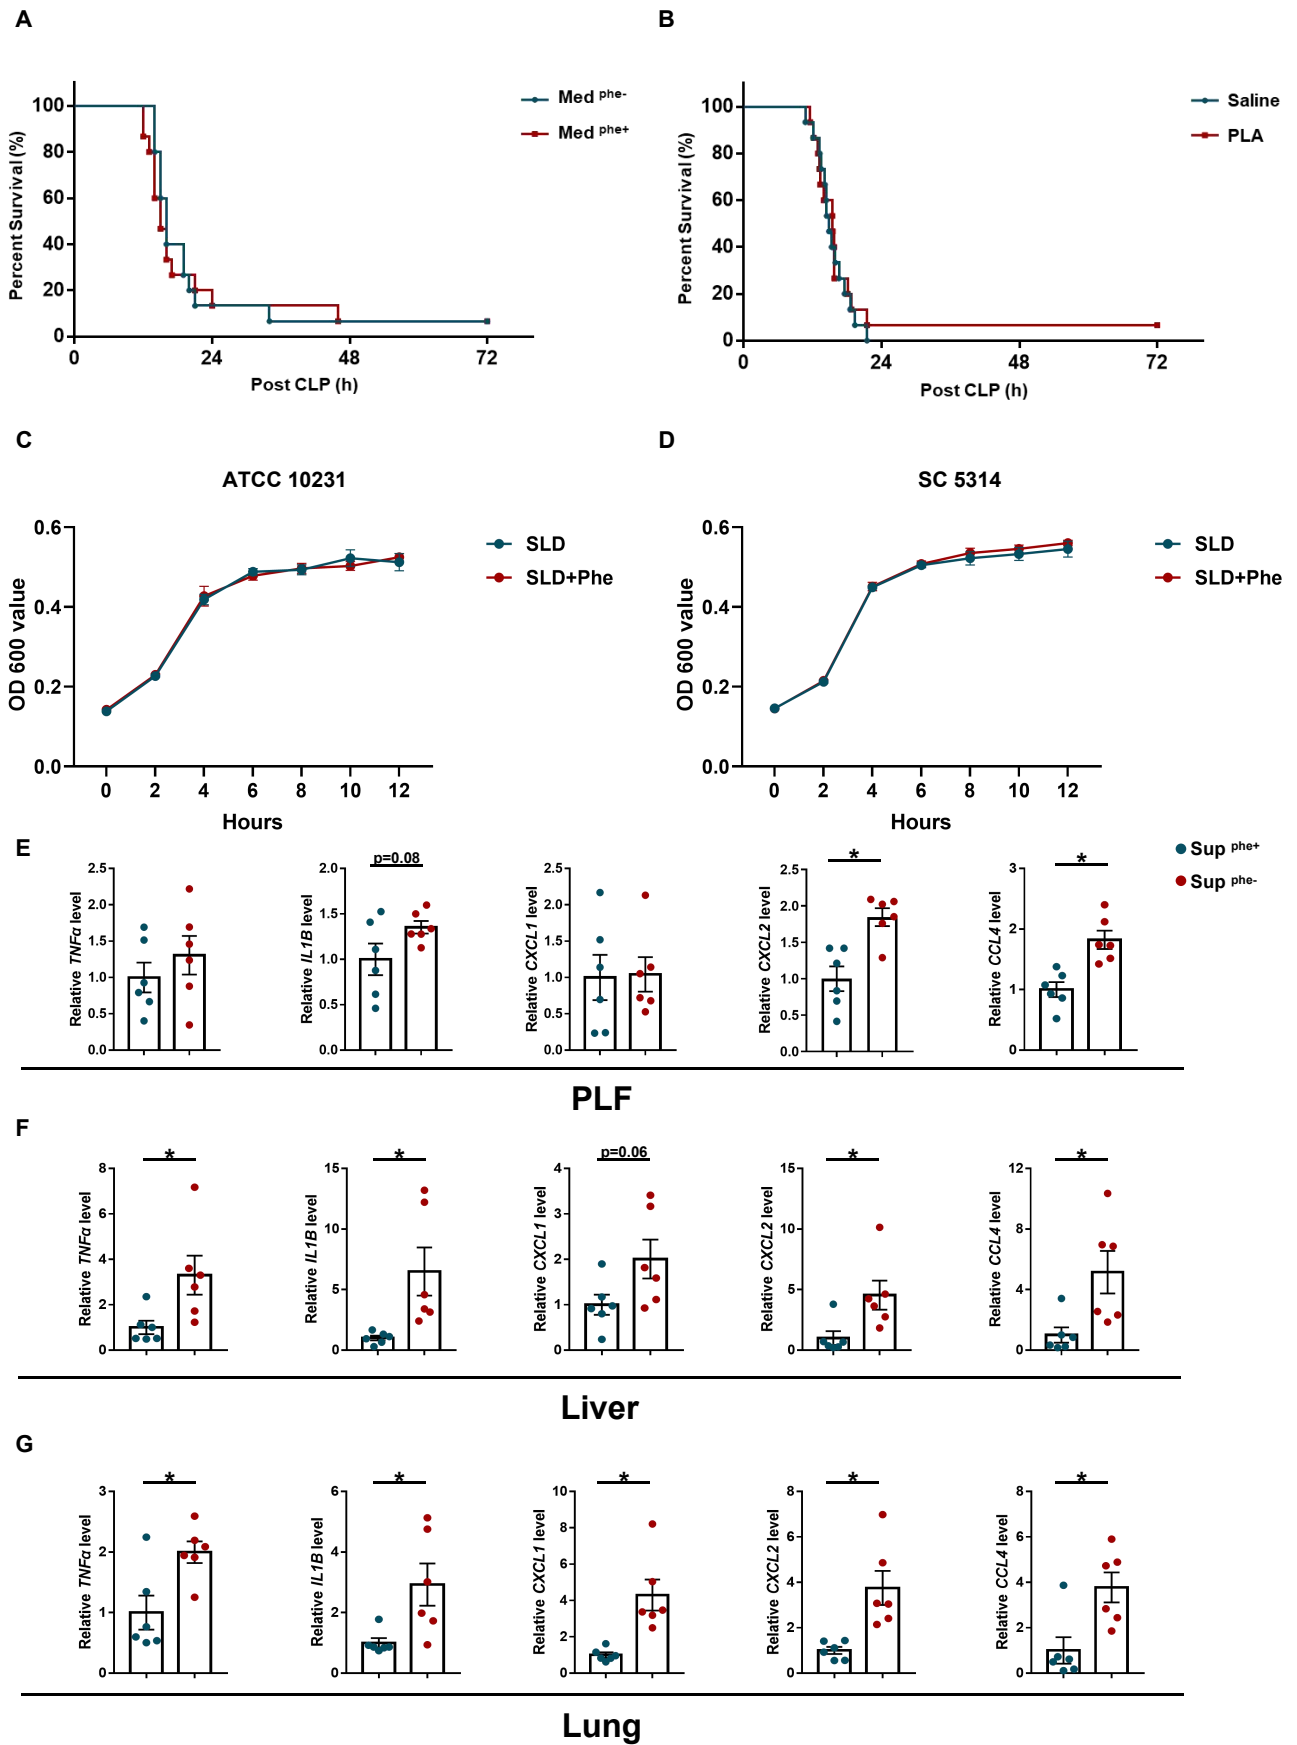

Figure S6

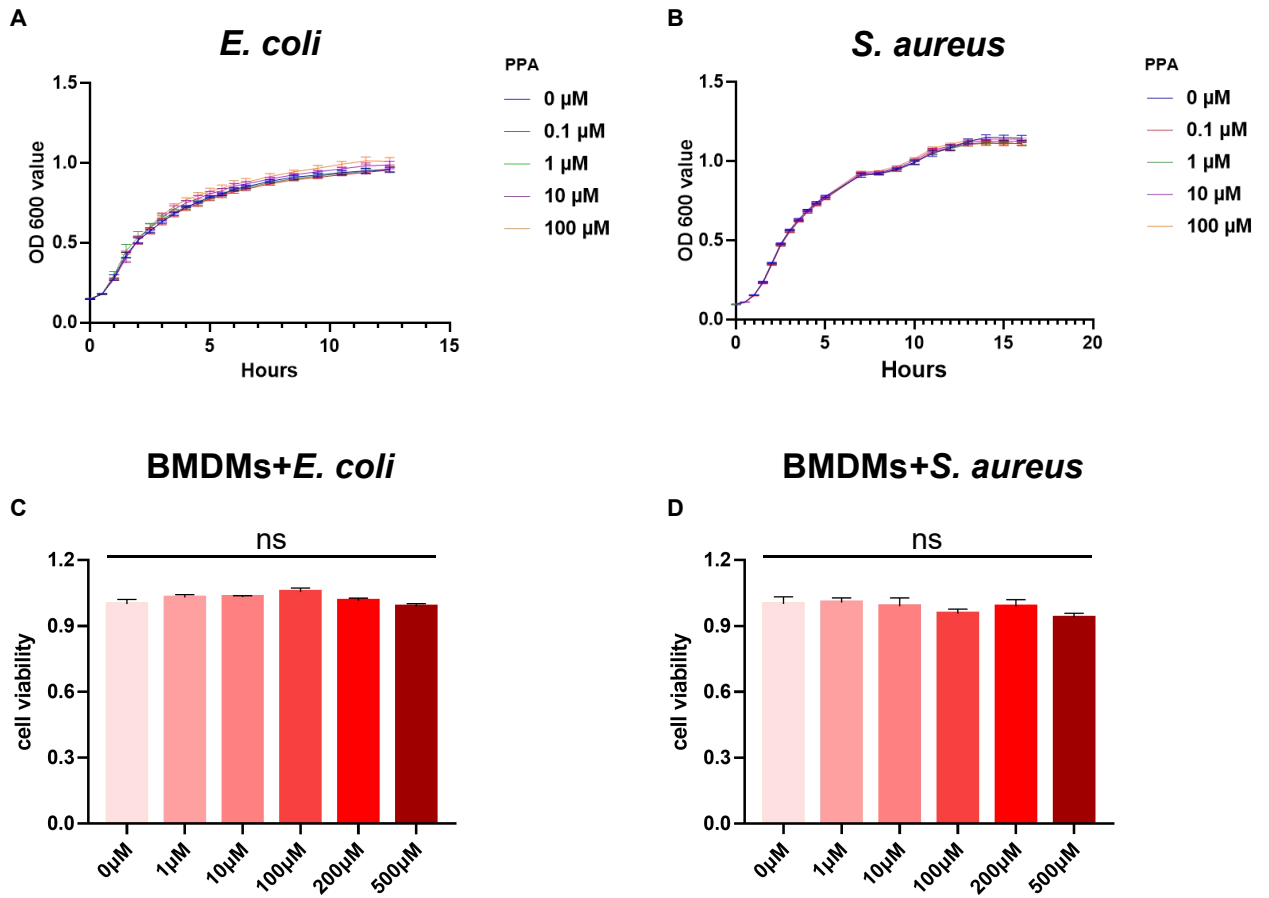

Figure S7

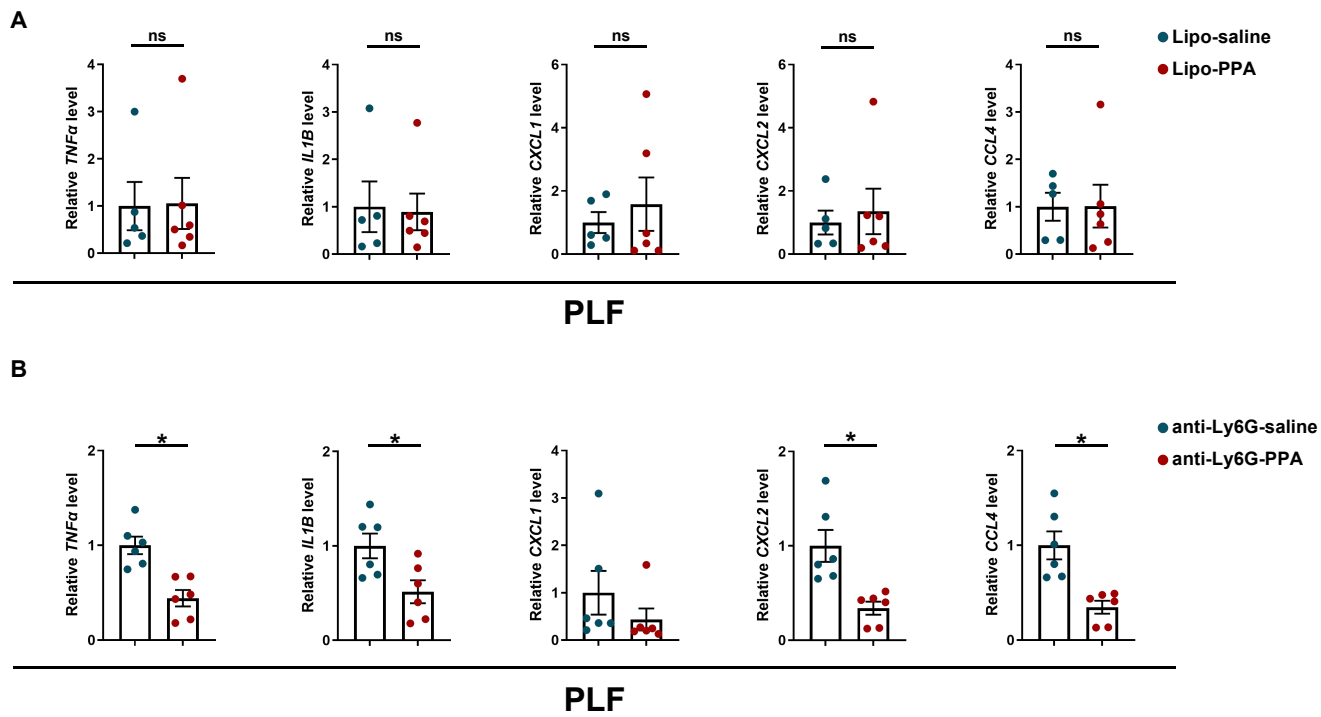

Figure S8

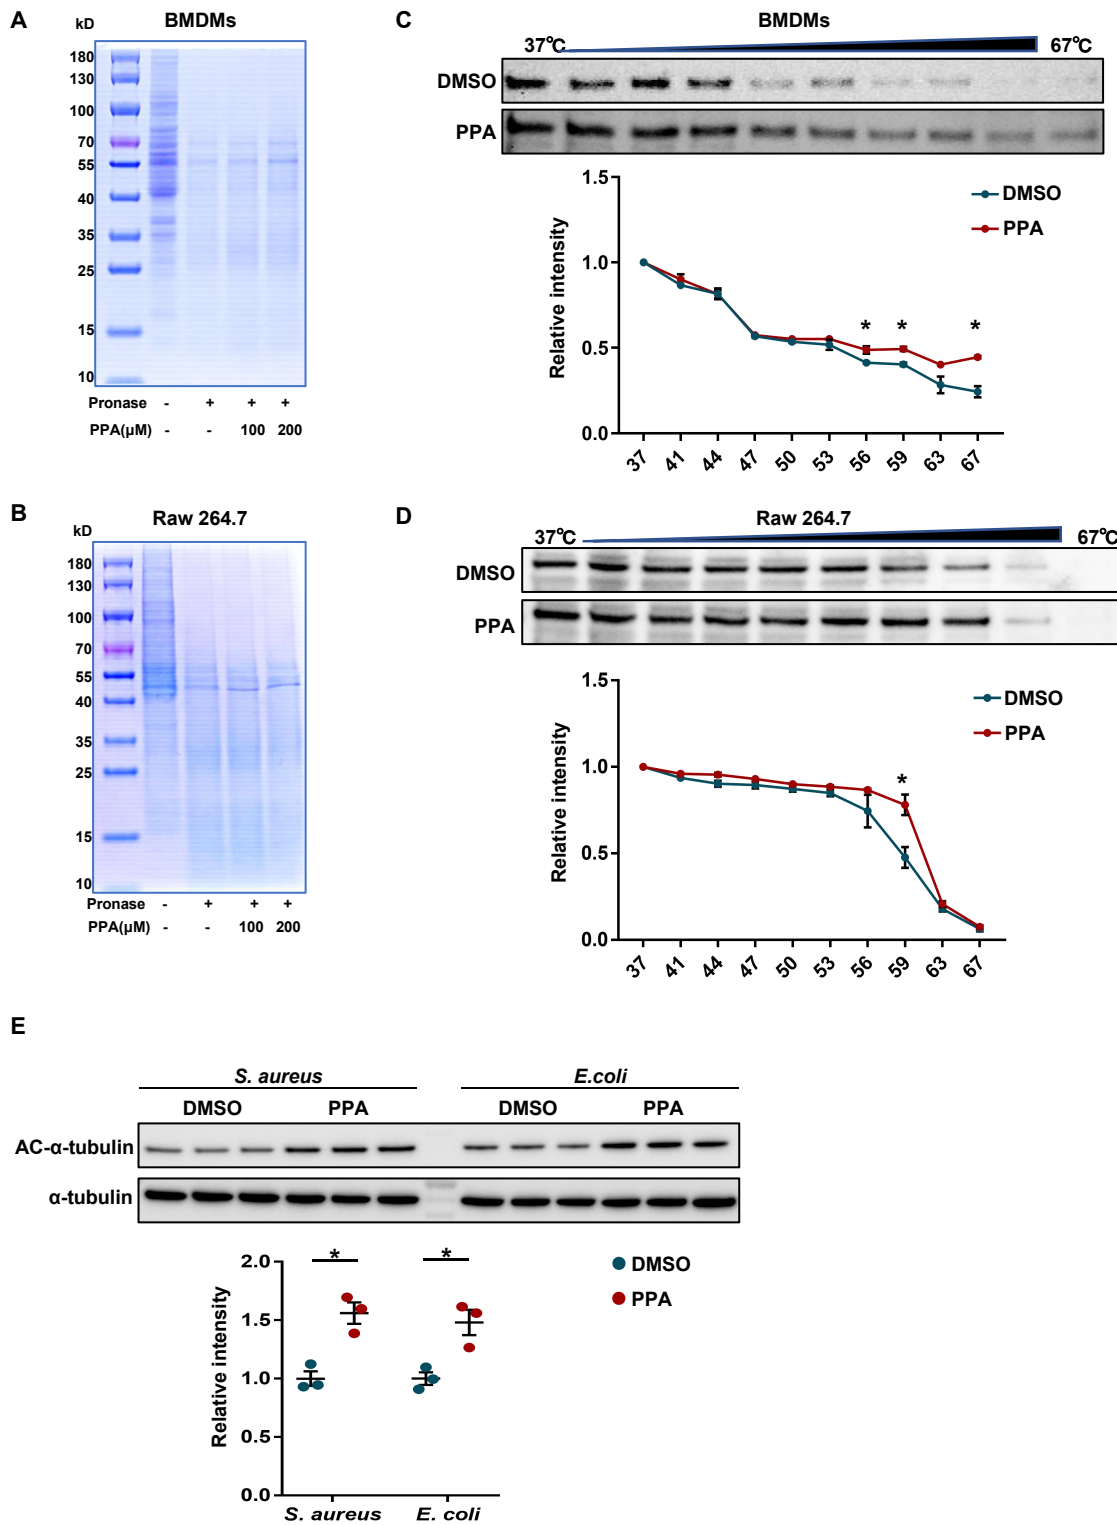



Figure S9

A

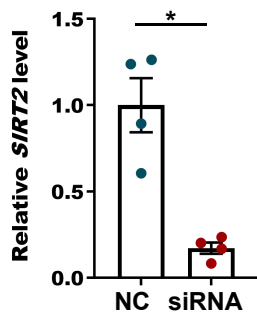

B

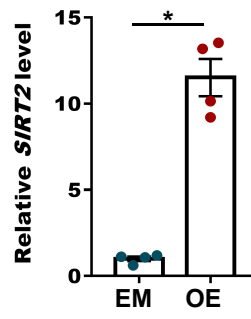

Figure S10

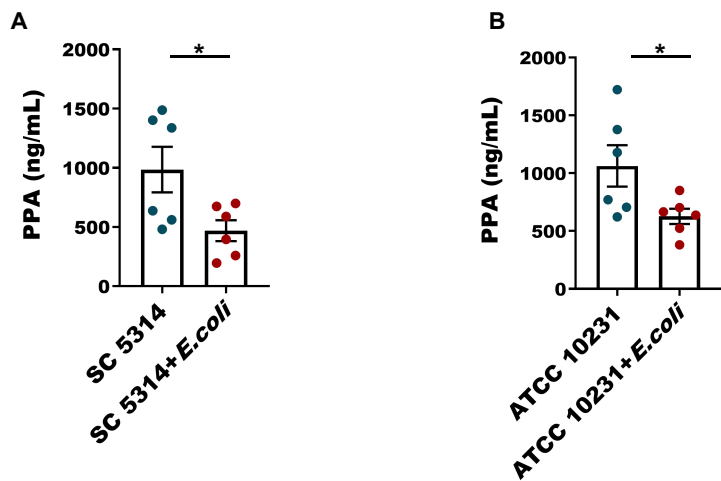

Supplement: 41423_2023_1070_MOESM2_ESM.pdf [file 41423_2023_1070_MOESM2_ESM.pdf]
